# Supplementary material for: Synergistic self-driven and heterogeneous effect of a biomass-derived urchin-like Mn 3 O 4 /C 3 N 4 Janus micromotor catalyst for efficient degradation of carbamazepine
Source: Royal Society of Chemistry journal article supplement (doi:10.1039/d4ra04980b), 2024-01-01
Supplement: d4ra04980b1.pdf [file d4ra04980b1.pdf]

*Electronic Supplementary Information*

Synergy of Self-Driven and Heterogeneous Effect  
on Biomass-Derived Urchin-like  $\text{Mn}_3\text{O}_4/\text{C}_3\text{N}_4$   
Janus Micromotor Catalyst for Efficient  
Degradation of Carbamazepine

Jie Yang,<sup>1</sup> Wenning Yang,<sup>2#</sup> Chao Zhang,<sup>3</sup> Jian Gong,<sup>1</sup> Ming Xu,<sup>4</sup> Jia Li,<sup>5\*</sup> Chengzhang Liu<sup>5</sup>

<sup>1</sup> Department of Pharmaceutical and Bioengineering, Zibo Vocational Institute, Zibo, 255000, P.  
R. China

<sup>2</sup> Shandong Provincial Key Laboratory of Chemical Energy Storage and Novel Cell Technology,  
and School of Chemistry and Chemical Engineering, Liaocheng University, Liaocheng 252000, P.  
R. China

<sup>3</sup> School of Artificial Intelligence and Big Data, Zibo Vocational Institute, Zibo, 255000, P. R.  
China

<sup>4</sup> State Key Laboratory of Chemical Resource Engineering, Beijing University of Chemical  
Technology, Beijing, 100029, P. R. China

<sup>5</sup> School of Material Science and Engineering, University of Jinan, Jinan, 250022, China

# The authors contribute equally: Wenning Yang

\* Corresponding author: mse\_lij@ujn.edu.cn (Jia Li), +86139531854

**Keywords:** Biomass, Heterostructure, Photocatalysis, Micromotor, Carbamazepine

## **Table of Content**

### **Section 1: Supporting Video**

**Video S1** Motion behavior of  $\text{Mn}_3\text{O}_4/\text{C}_3\text{N}_4/\text{C}$  Janus micromotor catalyst ( $\text{Mn}_3\text{O}_4/\text{C}_3\text{N}_4$ -JMC) in 1%, 3% and 5%  $\text{H}_2\text{O}_2$  aqueous containing 0.5% of sodium dodecyl sulfonate.

### **Section 2: Figures**

**Figure S1** DSC curves of  $\text{Mn}_3\text{O}_4/\text{C}_3\text{N}_4$ -JMC.

**Figure S2** Effect of active substance trapping agent on degradation.

### **Section 3: Tables**

**Table S1** Pore texture parameters of the obtained samples.

**Section 4: The study of drag force, resistance and working efficiency of micromotor catalyst.**

## Section 2: Figures

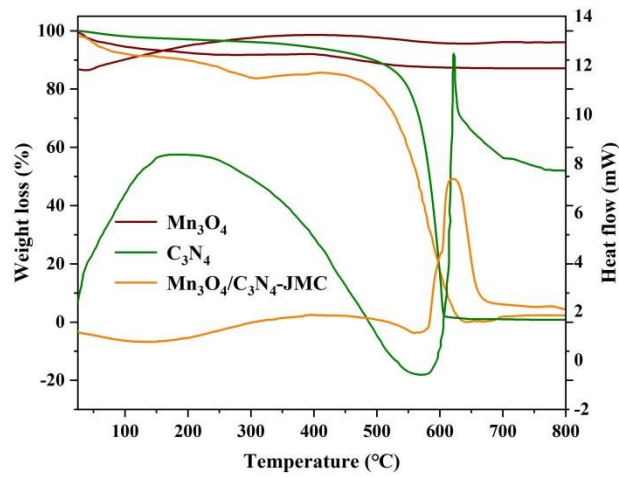

**Figure S1** DTA curves of  $\text{Mn}_3\text{O}_4/\text{C}_3\text{N}_4\text{-JMC}$ , pure  $\text{Mn}_3\text{O}_4$  and  $\text{C}_3\text{N}_4$ .

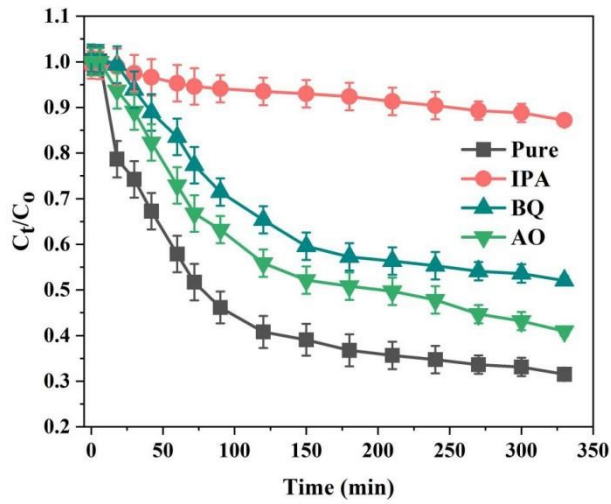

**Figure S2** Effect of active substance trapping agent on degradation

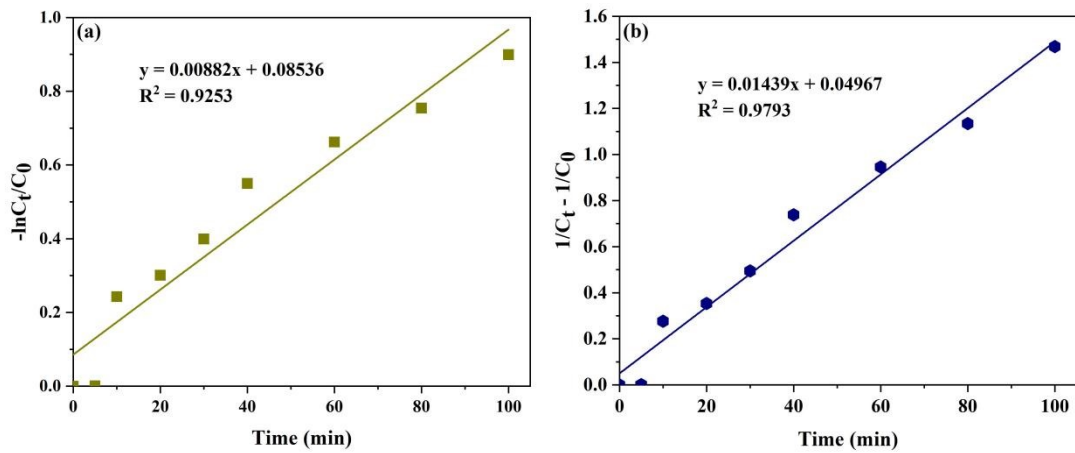

**Figure S3** Plot of pseudo-first-order kinetics (a) and pseudo-second-order kinetics (b) for photocatalytic degradation of CBZ by  $\text{Mn}_3\text{O}_4/\text{C}_3\text{N}_4\text{-JMC}$

### Section 3: Tables

**Table S1** Pore texture parameters of the obtained samples

| Sample | $S_{\text{BET}}$ ( $\text{m}^2 \cdot \text{g}^{-1}$ ) | $V_{\text{Total}}$ ( $\text{cm}^3 \cdot \text{g}^{-1}$ ) | $D_p$ (nm) |
|--------|-------------------------------------------------------|----------------------------------------------------------|------------|
| 1#     | 92.81                                                 | 0.3288                                                   | 7.1        |
| 2#     | 98.63                                                 | 0.4558                                                   | 9.2        |
| 3#     | 81.35                                                 | 0.2825                                                   | 6.3        |

<sup>a</sup>  $S_{\text{BET}}$ : BET specific surface area;  $S_{\text{Micro}}$ : micropore surface area;  $V_{\text{Total}}$ : total pore volume;  $V_{\text{Micro}}$ : micropore volume;  $D_p$ : average pore

## Section 4: The study of drag force, resistance and working efficiency of micromotor catalyst

The drag force, resistance and working efficiency of the  $Mn_3O_4/C_3N_4$ -JMC were studied. It is assumed that the drag force generated by the bubble breaking away from the catalyst surface is equal to the steady-state fluid power. Therefore, the speed and force of the catalyst under low Reynolds coefficient can be estimated by the following formula:

$$F_{drag} = 6\pi\mu\gamma v \quad (1)$$

$v(m\cdot s^{-1})$  is the speed of micromotor catalyst motion,  $\mu(mPa\cdot s)$  is fluid viscosity, and  $\gamma(m)$  is distance traveled in a given amount of time.

The kinetic energy of the micromotor catalyst driven by bubbles is actually converted from the chemical energy generated by the decomposition of  $H_2O_2$  by  $Mn_3O_4$ . Therefore, the efficiency of the catalyst can be calculated by the following formula [1]:

$$\eta = P_{mecha}/P_{chem} \quad (2)$$

$$P_{mecha} = F_{drag} \cdot v = 6\pi\mu\gamma v^2 \quad (3)$$

$$P_{chem} = n \cdot \Delta r^\theta G \quad (4)$$

$$n = PV/RT \quad (5)$$

$$V = N \cdot 4\pi R_0^3/3 \quad (6)$$

$\eta$  is the efficiency of the catalyst,  $P_{mecha}$  is catalyst mechanical power ( $W\cdot motor^{-1}$ ),  $P_{chem}$  is chemical input power ( $W\cdot motor^{-1}$ ), which is equal to the chemical energy of all the gas produced,  $V$  is the volume of an ideal gas.  $n$  is mol of gas (mol),  $T$  is thermodynamic temperature of an ideal gas (K),  $N$  is the number of bubbles per second,  $R_0$  is the diameter of bubble (m) [2].

### Notes and references

- (1) W. Gao, S. Sattayasamitsathit, J. Orozco, J. Wang, Highly efficient catalytic microengines: template electrosynthesis of polyaniline/platinum microtubes, *J. Am. Chem. Soc.* 133 (2011) 11862-11864.
- (2) P. Kannan, T. Maiyalagan, E. Marsili, S. Ghosh, J. Niedziolka-Jonsson, M. Jonsson-Niedziolka, Hierarchical 3-dimensional nickel–iron nanosheet arrays on carbon fiber paper as a novel electrode for non-enzymatic glucose sensing, *Nanoscale* 8 (2016) 843-855.
